# Supplementary material for: Screening of Anorectal and Oropharyngeal Samples Fails to Detect Bacteriophages Infecting Neisseria gonorrhoeae
Source: MDPI journal article supplement (doi:10.3390/antibiotics11020268), 2022-02-18
Supplement: s1 [file s1]

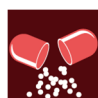

## Supplementary Materials

Supplementary Table S1. *N. gonorrhoeae* strains used for phage enrichment and isolation.

|                 |                  | Isolate Name | Year of Isolation | Location of Diagnosis | Isolation Site        | MIC AZM (mg/L) | MIC CRO (mg/L) |
|-----------------|------------------|--------------|-------------------|-----------------------|-----------------------|----------------|----------------|
|                 |                  |              |                   |                       |                       |                |                |
| Phage isolation | Phage enrichment | 1            | 2019              | Belgium               | Pharynx               | 0.5            | 0.016          |
|                 |                  | 2            | 2019              | Belgium               | Pharynx               | 1.5            | 0.016          |
|                 |                  | 3            | 2019              | Belgium               | Pharynx               | 1              | 0.016          |
|                 |                  | 4            | 2018              | Belgium               | Pharynx               | 0.125          | 0.023          |
|                 |                  | 5            | 2019              | Belgium               | Anorectum             | 2              | 0.016          |
|                 |                  | 6            | 2019              | Belgium               | Anorectum             | 0.19           | 0.125          |
|                 |                  | 7            | 2019              | Belgium               | Anorectum             | 0.25           | ≤0.016         |
|                 |                  | 8            | 2017              | Belgium               | Urine                 | 16             | 0.03           |
|                 |                  | 9            | 2019              | Belgium               | Anorectum             | 256            | 0.023          |
|                 |                  | 10           | 2018              | Belgium               | Urine                 | 1              | 0.19           |
|                 |                  | 11           | 2018              | Belgium               | Urethra               | 0.25           | 0.19           |
|                 |                  | WHO F        | 1991              | Canada                | Unknown               | 0.125          | <0.002         |
|                 |                  | WHO K        | 2003              | Japan                 | Unknown               | 0.25           | 0.064          |
|                 |                  | WHO L        | 1996              | Asia                  | Unknown               | 0.5            | 0.25           |
|                 |                  | WHO U        | 2011              | Sweden                | Pharynx               | 4              | 0.002          |
|                 |                  | WHO V        | 2012              | Sweden                | Urethra               | 256            | 0.064          |
|                 |                  | WHO W        | 2007              | Hong Kong             | Urethra or endocervix | 0.5            | 0.064          |
|                 |                  | WHO X        | 2009              | Japan                 | Pharynx               | 0.5            | 2              |
|                 |                  | WHO Y        | 2010              | France                | Urethra               | 1              | 1              |
|                 |                  | WHO Z        | 2013              | Australia             | Genital               | 1              | 0.5            |

MIC: Minimal Inhibitory Concentration, AZM: Azithromycin, CRO: Ceftriaxone. .
